# Supplementary material for: CD8+ T cell differentiation status correlates with the feasibility of sustained unresponsiveness following oral immunotherapy
Source: PubMed Central journal article supplement (PMC9636180; doi:10.1038/s41467-022-34222-8), 2022-11-04
Supplement: 41467_2022_34222_MOESM4_ESM.pdf [file 41467_2022_34222_MOESM4_ESM.pdf]

## Reporting Summary

Nature Research wishes to improve the reproducibility of the work that we publish. This form provides structure for consistency and transparency in reporting. For further information on Nature Research policies, see our [Editorial Policies](#) and the [Editorial Policy Checklist](#).

### Statistics

For all statistical analyses, confirm that the following items are present in the figure legend, table legend, main text, or Methods section.

n/a Confirmed

- The exact sample size ( $n$ ) for each experimental group/condition, given as a discrete number and unit of measurement
- A statement on whether measurements were taken from distinct samples or whether the same sample was measured repeatedly
- The statistical test(s) used AND whether they are one- or two-sided  
*Only common tests should be described solely by name; describe more complex techniques in the Methods section.*
- A description of all covariates tested
- A description of any assumptions or corrections, such as tests of normality and adjustment for multiple comparisons
- A full description of the statistical parameters including central tendency (e.g. means) or other basic estimates (e.g. regression coefficient) AND variation (e.g. standard deviation) or associated estimates of uncertainty (e.g. confidence intervals)
- For null hypothesis testing, the test statistic (e.g.  $F$ ,  $t$ ,  $r$ ) with confidence intervals, effect sizes, degrees of freedom and  $P$  value noted  
*Give  $P$  values as exact values whenever suitable.*
- For Bayesian analysis, information on the choice of priors and Markov chain Monte Carlo settings
- For hierarchical and complex designs, identification of the appropriate level for tests and full reporting of outcomes
- Estimates of effect sizes (e.g. Cohen's  $d$ , Pearson's  $r$ ), indicating how they were calculated

*Our web collection on [statistics for biologists](#) contains articles on many of the points above.*

### Software and code

Policy information about [availability of computer code](#)

|                 |                                                                                                                                                                                                                                                                                                                                                                                                                                                                                                                                                                                                                                                                                                                                                                                                                                           |
|-----------------|-------------------------------------------------------------------------------------------------------------------------------------------------------------------------------------------------------------------------------------------------------------------------------------------------------------------------------------------------------------------------------------------------------------------------------------------------------------------------------------------------------------------------------------------------------------------------------------------------------------------------------------------------------------------------------------------------------------------------------------------------------------------------------------------------------------------------------------------|
| Data collection | No Software was used to collect any publicly or commercially available dataset.                                                                                                                                                                                                                                                                                                                                                                                                                                                                                                                                                                                                                                                                                                                                                           |
| Data analysis   | R (version 3.6): The R Foundation for Statistical Computing Platform.<br>R package FlowSOM (Version 2.2.0): Using self-organizing maps for visualization and interpretation of cytometry data<br>R package UMAP (version 0.2.7.0): Uniform Manifold Approximation and Projection<br>R package ggplot (version 3.3.3): Create Elegant Data Visualisations Using the Grammar<br>R package elasticnet (version 1.3): Elastic-Net for Sparse Estimation and Sparse PCA<br>R package lmerTest (Version 3.1-3): Tests in Linear Mixed Effects Models<br>R package pheatmap (version 1.0.12): A function to draw clustered heatmaps.<br>R Package flowStats (version 4.4.0)<br>R package rstatix (Version 0.7.0)<br>Helios Mass Cytometer Software v7.0 (Fluidigm, South San Francisco, CA, USA)<br>FlowJo (V10)<br>BioRender online application |

For manuscripts utilizing custom algorithms or software that are central to the research but not yet described in published literature, software must be made available to editors and reviewers. We strongly encourage code deposition in a community repository (e.g. GitHub). See the Nature Research [guidelines for submitting code & software](#) for further information.

## Data

Policy information about [availability of data](#)

All manuscripts must include a [data availability statement](#). This statement should provide the following information, where applicable:

- Accession codes, unique identifiers, or web links for publicly available datasets
- A list of figures that have associated raw data
- A description of any restrictions on data availability

Raw unlabeled POISED Mass Cytometry dataset files in FCS 3.0 format and associated meta-data as well as gating schema can be obtained from FlowRepository (FR-FCM-Z4MA and FR-FCM-Z2V9). Wherein, experiment ID FR-FCM-Z4MA may be accessed via the following URL:

<https://flowrepository.org/id/RvFrOki98cB1R0srOsojhr4rTjpcChGopou7h7BCE2CAS6fygNWUdFLnbCSEO38>.

Please share this URL with the reviewers.

## Field-specific reporting

Please select the one below that is the best fit for your research. If you are not sure, read the appropriate sections before making your selection.

- Life sciences     Behavioural & social sciences     Ecological, evolutionary & environmental sciences

For a reference copy of the document with all sections, see [nature.com/documents/nr-reporting-summary-flat.pdf](https://www.nature.com/documents/nr-reporting-summary-flat.pdf)

## Life sciences study design

All studies must disclose on these points even when the disclosure is negative.

|                 |                                                                                                                                                                                                                                                                                     |
|-----------------|-------------------------------------------------------------------------------------------------------------------------------------------------------------------------------------------------------------------------------------------------------------------------------------|
| Sample size     | The sample size calculation was performed and reported in the POISED clinical trial original publication (PMID: 31522849). In the current post-hoc mechanistic analysis, we applied stringent statistical tests corrected for batch effects along with multiple hypothesis testing. |
| Data exclusions | No data were excluded from this study                                                                                                                                                                                                                                               |
| Replication     | Mass cytometry analysis was performed as a single experiment per sample. Luminex analysis was performed a single experiment per sample with technical replicates (duplicates).                                                                                                      |
| Randomization   | Randomization details have been reported in the POISED clinical trial original publication (PMID: 31522849).                                                                                                                                                                        |
| Blinding        | Investigators were blinded during the original clinical trial (PMID: 31522849) but not in the current post-hoc mechanistic analysis.                                                                                                                                                |

## Reporting for specific materials, systems and methods

We require information from authors about some types of materials, experimental systems and methods used in many studies. Here, indicate whether each material, system or method listed is relevant to your study. If you are not sure if a list item applies to your research, read the appropriate section before selecting a response.

### Materials & experimental systems

| n/a                                 | Involved in the study                                           |
|-------------------------------------|-----------------------------------------------------------------|
| <input type="checkbox"/>            | <input checked="" type="checkbox"/> Antibodies                  |
| <input checked="" type="checkbox"/> | <input type="checkbox"/> Eukaryotic cell lines                  |
| <input checked="" type="checkbox"/> | <input type="checkbox"/> Palaeontology and archaeology          |
| <input checked="" type="checkbox"/> | <input type="checkbox"/> Animals and other organisms            |
| <input type="checkbox"/>            | <input checked="" type="checkbox"/> Human research participants |
| <input checked="" type="checkbox"/> | <input type="checkbox"/> Clinical data                          |
| <input checked="" type="checkbox"/> | <input type="checkbox"/> Dual use research of concern           |

### Methods

| n/a                                 | Involved in the study                              |
|-------------------------------------|----------------------------------------------------|
| <input checked="" type="checkbox"/> | <input type="checkbox"/> ChIP-seq                  |
| <input type="checkbox"/>            | <input checked="" type="checkbox"/> Flow cytometry |
| <input checked="" type="checkbox"/> | <input type="checkbox"/> MRI-based neuroimaging    |

## Antibodies

Antibodies used

Metal label, Specificity, Clone, Catalogue #, Source, Metal conjugation, Dilution, Surface vs. Intracellular  
 89Y, CD57, HCD57, 322302, Biolegend, in-house, 1:50, Surface  
 115In, live/dead, maleimide-monoamide-DOTA, B-272, Macrocyclics, commercially available, 2.125, Surface  
 113In, CD86, IT2.2, 305435, Biolegend, in-house, 1:50, Surface  
 141Pr, OX40, ACT35, 555836, BD, in-house, 1:50, Surface  
 142Nd, CD19, HIB19, 3142001B, Fluidigm, commercially available, 1:100, Surface  
 143Nd, CD49b, P1E6-C5, 359301, Biolegend, in-house, 1:50, Surface  
 144Nd, IL-4, MP4-25D2, 3144010B, Fluidigm, commercially available, 1:100, Intracellular

145Nd,CD4,RPA-T4,3145001B,Fluidigm,commercially available,1:100,Surface  
 146Nd,CD8,RPA-T8,3146001B,Fluidigm,commercially available,1:100,Surface  
 147Sm,CD20,2H7,3147001B,Fluidigm,commercially available,1:100,Surface  
 148Nd,CD38,HB-7,356602,Biolegend,in-house,1:200,Surface  
 149Sm,CCR4,205410,3149003A,Fluidigm,commercially available,1:100,Surface  
 150Nd,LAG3,874501,3150016B,Fluidigm,commercially available,1:100,Surface  
 151Eu,CD123,6H6,3151001B,Fluidigm,commercially available,1:100,Surface  
 152Sm,IL9,MH9A3,507704,Biolegend,in-house,1:50,Intracellular  
 153Eu,CD45RA,HI100,3153001B,Fluidigm,commercially available,1:100,Surface  
 154Sm,CD3,UCHT1,3154003B,Fluidigm,commercially available,1:200,Surface  
 155Gd,CD28,L283,340975,BD,commercially available,1:200,Surface  
 156Gd,GPR15,SA302A10,custom,Biolegend,in-house,1:50,Surface  
 157Gd,HLA-DR,G46-6,555810,BD,in-house,1:200,Surface  
 158Gd,CD33,WM53,3158001B,Fluidigm,commercially available,1:100,Surface  
 159Tb,CD11c,Bu15,3159001,Fluidigm,commercially available,1:200,Surface  
 160Gd,CD14,M5E2,3160001B,Fluidigm,commercially available,1:100,Surface  
 161Dy,IFNg,4S.B4, 147319-85,ebioscience,in-house,1:200,Intracellular  
 162Dy,CD69,FN50,3162001B,Fluidigm,commercially available,1:100,Intracellular  
 163Dy,CXCR3,G025H7,3163004B,Fluidigm,commercially available,1:100,Surface  
 164Dy,IL-17,N49-853,3164002B,Fluidigm,commercially available,1:100,Intracellular  
 165Ho,CD127,A019D5,3165008B,Fluidigm,commercially available,1:100,Surface  
 166Er,LAP,TW7-28G11,146703,Biolegend,in-house,1:50,Intracellular  
 167Er,CD27,L128,3167006B,Fluidigm,commercially available,1:100,Surface  
 168Er,CD40L,24-31,3168006B,Fluidigm,commercially available,1:100,Intracellular  
 169Tm,CCR7,G043H7,35322,Biolegend,in-house,1:200,Surface  
 170Er,PD1,EH12.1,562138,BD,in-house,1:100,Surface  
 171Yb,IL-10,JES3-9D7,501402,Biolegend,in-house,1:50,Intracellular  
 172Yb,beta 7 integrin,FIB27,121003,Biolegend,in-house,1:100,Surface  
 173Yb,CD25,M-A251,555430,BD,in-house,1:100,Surface  
 174Yb,CD56,NCAM16.2,559043,BD,in-house,1:50,Surface  
 175Lu,TCRgd,B1,331202,Biolegend,in-house,1:50,Surface  
 176Yb,CLA,HECA452,3176018B,Fluidigm,commercially available,1:100,Surface  
 209Bi,CD16,3G8,3209002B,Fluidigm,commercially available,1:100,Surface

## Validation

For in-house metal conjugation, purified antibodies were purchased from BD Biosciences or Biolegend. Each in-house conjugated antibody per batch of conjugation was tested and titrated using unstimulated and PMA/Ionomycin-stimulated PBMCs isolated from a buffy coat sample. Metal pre-conjugated, QA/QCed, ready-to-use antibodies were purchased from Fluidigm. The whole antibody panel was tested and validated for its function using unstimulated and PMA/Ionomycin-stimulated PBMCs isolated from a buffy coat sample.

## Human research participants

Policy information about [studies involving human research participants](#)

### Population characteristics

participant\_id,Gender,age\_of\_enrollment,Age\_diagnosis\_pea\_allergy,History of asthma?,History of allergic rhinitis?,History of atopic dermatitis?,Ethnicity:

P001, Male, 9, 2, Yes, No, Yes, Not Hispanic or Latino  
P002, Male, 8, 1, No, Yes, Yes, Not Hispanic or Latino  
P003, Male, 8, 3, Yes, Yes, Yes, Not Hispanic or Latino  
P004, Female, 9, 1.5, Yes, Yes, Yes, Not Hispanic or Latino  
P005, Male, 11, 0.75, Yes, Yes, Yes, Not Hispanic or Latino  
P006, Male, 12, 1, Yes, Yes, Yes, Not Hispanic or Latino  
P007, Male, 10, 1, Yes, Yes, Yes, Not Hispanic or Latino  
P008, Male, 16, 1, Yes, Yes, Yes, Not Hispanic or Latino  
P009, Male, 8, 1.16, No, Yes, Yes, Not Hispanic or Latino  
P010, Female, 10, 1.67, Yes, Yes, Yes, Not Hispanic or Latino  
P011, Male, 11, 1, No, Yes, Yes, Not Hispanic or Latino  
P012, Male, 9, 1, Yes, No, Yes, Not Hispanic or Latino  
P013, Male, 13, 1, No, Yes, Yes, Not Hispanic or Latino  
P014, Female, 9, 1, Yes, Yes, Yes, Not Hispanic or Latino  
P015, Female, 12, 6, Yes, Yes, No, Not Hispanic or Latino  
P016, Male, 9, 2, Yes, Yes, Yes, Not Hispanic or Latino  
P017, Male, 10, 0.92, No, Yes, Yes, Not Hispanic or Latino  
P018, Male, 12, 1, Yes, Yes, Yes, Not Hispanic or Latino  
P019, Male, 9, 2, Yes, Yes, Yes, Not Hispanic or Latino  
P020, Male, 8, 2, Yes, Yes, Yes, Not Hispanic or Latino  
P021, Male, 11, 1, Yes, Yes, Yes, Not Hispanic or Latino  
P022, Male, 11, 1.25, No, Yes, Yes, Not Hispanic or Latino  
P023, Female, 8, 3, Yes, Yes, Yes, Not Hispanic or Latino  
P024, Male, 9, 0.75, Yes, Yes, Yes, Not Hispanic or Latino  
P025, Male, 10, 2, Yes, Yes, Yes, Not Hispanic or Latino  
P026, Male, 9, 1.7, Yes, Yes, No, Hispanic or Latino  
P027, Female, 12, 1.25, No, Yes, Yes, Not Hispanic or Latino  
P028, Male, 11, 1, No, Yes, Yes, Not Hispanic or Latino  
P029, Female, 15, 1, No, No, No, Not Hispanic or Latino  
P030, Female, 17, 2, No, No, No, Not Hispanic or Latino  
P031, Male, 9, 3, No, No, No, Not Hispanic or Latino  
P032, Male, 9, 0.66, No, Yes, No, Not Hispanic or Latino  
P033, Female, 10, 0.8, No, No, Yes, Not Hispanic or Latino  
P034, Female, 14, 0.9, No, Yes, Yes, Not Hispanic or Latino  
P035, Male, 8, 0.8, Yes, Yes, Yes, Not Hispanic or Latino  
P036, Male, 14, 0.75, Yes, Yes, Yes, Not Hispanic or Latino  
P037, Male, 10, 1, Yes, Yes, Yes, Not Hispanic or Latino  
P038, Male, 11, 0.5, Yes, Yes, Yes, Not Hispanic or Latino  
P039, Male, 9, 2, Yes, No, Yes, Not Hispanic or Latino  
P040, Female, 8, 0.5, Yes, Yes, Yes, Not Hispanic or Latino  
P041, Female, 8, 1.5, Yes, Yes, No, Not Hispanic or Latino  
P042, Male, 9, 1.5, Yes, Yes, Yes, Not Hispanic or Latino  
P043, Male, 9, 1, No, No, Yes, Not Hispanic or Latino  
P044, Male, 12, 1.5, No, Yes, No, Not Hispanic or Latino  
P045, Male, 12, 3, Yes, Yes, No, Not Hispanic or Latino  
P046, Male, 11, 1.2, No, Yes, Yes, Not Hispanic or Latino  
P047, Male, 15, 1.25, No, No, Yes, Not Hispanic or Latino  
P048, Male, 13, 3, No, Yes, Yes, Not Hispanic or Latino  
P049, Male, 12, 1, No, Yes, Yes, Not Hispanic or Latino  
P050, Female, 11, 2, Yes, No, Yes, Not Hispanic or Latino  
P051, Female, 9, 1, No, No, No, Not Hispanic or Latino  
P052, Female, 16, 2, Yes, No, Yes, Not Hispanic or Latino  
P053, Female, 18, 1, Yes, No, Yes, Not Hispanic or Latino  
P054, Female, 11, 1, Yes, Yes, Yes, Not Hispanic or Latino  
P055, Male, 12, 1.5, Yes, Yes, Yes, Not Hispanic or Latino  
P056, Female, 14, 11, No, No, No, Not Hispanic or Latino  
P057, Male, 10, 0.75, Yes, No, Yes, Not Hispanic or Latino  
P058, Male, 9, 0.8, Yes, Yes, Yes, Not Hispanic or Latino  
P059, Male, 8, 2.5, No, No, Yes, Not Hispanic or Latino  
P060, Female, 15, 3, Yes, Yes, Yes, Hispanic or Latino  
P061, Male, 10, 0.5, Yes, Yes, Yes, Not Hispanic or Latino  
P062, Female, 13, 2, No, Yes, Yes, Not Hispanic or Latino

P063,Female,13,1.5,Yes,Yes,No,Not Hispanic or Latino  
 P064,Male,9,3,No,Yes,Yes,Not Hispanic or Latino  
 P065,Male,8,2,Yes,No,No,Not Hispanic or Latino  
 P066,Male,9,1,Yes,Yes,Yes,Not Hispanic or Latino  
 P067,Male,8,3,Yes,Yes,Yes,Not Hispanic or Latino  
 P068,Male,9,2,Yes,Yes,Yes,Not Hispanic or Latino  
 P069,Male,8,5,Yes,No,No,Not Hispanic or Latino  
 P070,Male,9,3,Yes,Yes,Yes,Not Hispanic or Latino  
 P071,Female,12,0.67,Yes,Yes,Yes,Not Hispanic or Latino  
 P072,Female,8,1,No,No,No,Not Hispanic or Latino  
 P073,Female,8,1,Yes,No,Yes,Not Hispanic or Latino  
 P074,Male,8,0.67,No,Yes,Yes,Not Hispanic or Latino  
 P075,Male,16,3,Yes,Yes,Yes,Not Hispanic or Latino  
 P076,Male,13,1,No,Yes,Yes,Not Hispanic or Latino  
 P077,Female,8,1,Yes,No,Yes,Not Hispanic or Latino  
 P078,Male,12,4,Yes,Yes,No,Not Hispanic or Latino  
 P079,Female,7,1,Yes,Yes,Yes,Not Hispanic or Latino  
 P080,Female,8,0.75,Yes,No,No,Not Hispanic or Latino  
 P081,Female,7,2,No,Yes,No,Not Hispanic or Latino  
 P082,Male,14,1.5,Yes,Yes,Yes,Not Hispanic or Latino  
 P083,Female,7,1.5,No,No,Yes,Not Hispanic or Latino  
 P084,Male,7,1,Yes,No,Yes,Not Hispanic or Latino  
 P085,Male,16,0.5,Yes,Yes,Yes,Hispanic or Latino  
 P086,Male,11,3,Yes,Yes,Yes,Not Hispanic or Latino  
 P087,Female,7,1.2,Yes,No,Yes,Not Hispanic or Latino  
 P088,Female,8,5,No,Yes,Yes,Not Hispanic or Latino  
 P089,Male,7,3,Yes,Yes,No,Not Hispanic or Latino  
 P090,Male,7,2,Yes,Yes,Yes,Not Hispanic or Latino  
 P091,Female,13,2.5,Yes,Yes,No,Not Hispanic or Latino  
 P092,Female,7,3,Yes,Yes,Yes,Not Hispanic or Latino  
 P093,Male,8,2.5,No,No,No,Not Hispanic or Latino  
 P094,Male,7,2,Yes,Yes,Yes,Not Hispanic or Latino  
 P095,Male,7,2,Yes,Yes,Yes,Not Hispanic or Latino  
 P096,Female,7,1,No,Yes,Yes,Not Hispanic or Latino  
 P097,Male,7,1.5,No,Yes,Yes,Not Hispanic or Latino  
 P098,Male,7,1.5,No,Yes,No,Not Hispanic or Latino  
 P099,Male,16,1,No,No,No,Not Hispanic or Latino  
 P100,Male,47,5,Yes,Yes,No,Not Hispanic or Latino  
 P101,Male,29,2,Yes,Yes,No,Not Hispanic or Latino  
 P102,Male,33,3,No,Yes,No,Not Hispanic or Latino  
 P103,Male,22,8,Yes,Yes,No,Not Hispanic or Latino  
 P104,Male,27,2,Yes,No,No,Not Hispanic or Latino  
 P105,Male,35,8,Yes,Yes,No,Not Hispanic or Latino  
 P106,Male,53,2,Yes,Yes,No,Not Hispanic or Latino  
 P107,Female,26,2,No,No,Yes,Not Hispanic or Latino  
 P108,Male,22,3,Yes,Yes,No,Not Hispanic or Latino  
 P109,Female,47,0.33,Yes,Yes,Yes,Not Hispanic or Latino  
 P110,Female,29,1,Yes,Yes,Yes,Not Hispanic or Latino  
 P111,Male,20,4,Yes,No,Yes,Not Hispanic or Latino  
 P112,Male,49,0.5,Yes,Yes,Yes,Not Hispanic or Latino  
 P113,Male,43,6,Yes,Yes,No,Not Hispanic or Latino  
 P114,Male,19,1.5,No,Yes,Yes,Not Hispanic or Latino  
 P115,Male,24,5,Yes,Yes,Yes,Not Hispanic or Latino  
 P116,Male,22,1,Yes,Yes,Yes,Not Hispanic or Latino  
 P117,Female,24,3,No,Yes,Yes,Not Hispanic or Latino  
 P118,Male,31,3,Yes,Yes,No,Not Hispanic or Latino  
 P119,Male,26,9,Yes,Yes,Yes,Not Hispanic or Latino  
 P120,Female,26,0.5,Yes,Yes,Yes,Not Hispanic or Latino

## Recruitment

Criteria for patient recruitment is available in the original research article. Please refer to DOI: [https://doi.org/10.1016/S0140-6736\(19\)31793-3](https://doi.org/10.1016/S0140-6736(19)31793-3)

## Ethics oversight

The clinical research protocol for POISED study was approved by the Division of Allergy, Immunology, and Transplantation (DAIT) and the National Institute of Allergy and Infectious Diseases (NIAID) Allergy and Asthma Data Safety Management Board, the DAIT/NIAID Clinical Review Committee, the Stanford Institutional Review Board, and the US Food and Drug Administration (FDA). Written informed consent was obtained from adult participants or parents/ guardians of minor participants along with assent from minor participants of age 7 years and older. All compliant participants were given \$30 gift cards as a compensation for each study visit as consistent with Stanford IRB-approved protocol.

Note that full information on the approval of the study protocol must also be provided in the manuscript.

## Flow Cytometry

### Plots

Confirm that:

- The axis labels state the marker and fluorochrome used (e.g. CD4-FITC).
- The axis scales are clearly visible. Include numbers along axes only for bottom left plot of group (a 'group' is an analysis of identical markers).
- All plots are contour plots with outliers or pseudocolor plots.
- A numerical value for number of cells or percentage (with statistics) is provided.

### Methodology

Sample preparation

From each study participant, 40 mL blood was drawn by venipuncture at baseline of a peanut oral immunotherapy trials. Using validated, standardized, and published procedures, PBMCs and plasma isolated by ficoll-based density gradient centrifugation were frozen in aliquots, and stored in liquid nitrogen and at -80°C, respectively, until thawing for respective assays. In this analysis, we used samples taken at baseline. In-house metal conjugation of purified antibodies as indicated in table S1 was carried out using Maxpar antibody labeling kits (Fluidigm Co., South San Francisco, CA). PBMCs were thawed and rested overnight at 37°C with 5% CO<sub>2</sub> in a combination of RPMI, 10% FBS, and Pen-Strep. Cells were plated in a round-bottom, 96-well plate at the density of 3e6 cells in culture with 300 uL RPMI, 5% FBS, Pen-Strep per well. To evaluate peanut-specific response, PBMCs were stimulated with 200 ug/mL peanut solution for 24 hours with the addition of brefeldin A (5 ug/mL; Biolegend, San Diego, CA) for the last 4 hours. Unstimulated cells treated with brefeldin A for 4 hours before harvesting served as controls. Cells were harvested and stained as previously published with an added barcoding step post-permeabilizing the cells. Cell-ID 20-plex Palladium barcoding set (Fluidigm Co.) was used for barcoding according to manufacturer's instructions. Barcoded and pooled samples were acquired on a Helios mass cytometer (Fluidigm Co.).

Instrument

Helios Mass Cytometer (Fluidigm, South San Francisco, CA, USA)

Software

Data normalization, concatenation, and debarcoding were performed using CyTOF software (Fluidigm Co.). Manual gating on raw data files was carried out using FlowJo v10 (FlowJo LLC., Ashland, OR).

Cell population abundance

Cells were plated in a round-bottom, 96-well plate at the density of 3e6 cells in culture with 300 mL RPMI, 5% FBS, Pen-Strep per well.

Gating strategy

Gating Strategy is available along with FCS files at FlowRepository (FR-FCM-Z4MA and FR-FCM-Z2V9). Wherein, experiment ID FR-FCM-Z4MA may be accessed via the following URL:  
<https://flowrepository.org/id/RvFrOKi98cB1R0srOsojhr4rTJpjCchGopou7h7BCE2CAS6fYgNWUdFLnbCSEO38>.  
 Please share this URL with the reviewers.

- Tick this box to confirm that a figure exemplifying the gating strategy is provided in the Supplementary Information.
